# Supplementary material for: Tuning the photoreactivity of Z-hexatriene photoswitches by substituents – a non-adiabatic molecular dynamics study
Source: Royal Society of Chemistry journal article supplement (doi:10.1039/c8cp05181j), 2018-01-01
Supplement: c8cp05181j1.pdf [file c8cp05181j1.pdf]

# **Supporting Information – Tuning the Photoreactivity of Z-Hexatriene Photoswitches by Substituents - A Non-Adiabatic Molecular Dynamics Study**

Travis Thompson, Kenneth Redd, Dan Kim, and Enrico Tapavicza\*

*Department of Chemistry and Biochemistry, California State University, Long Beach, 1250  
Bellflower Blvd, Long Beach, CA 90840*

E-mail: Enrico.Tapavicza@csulb.edu

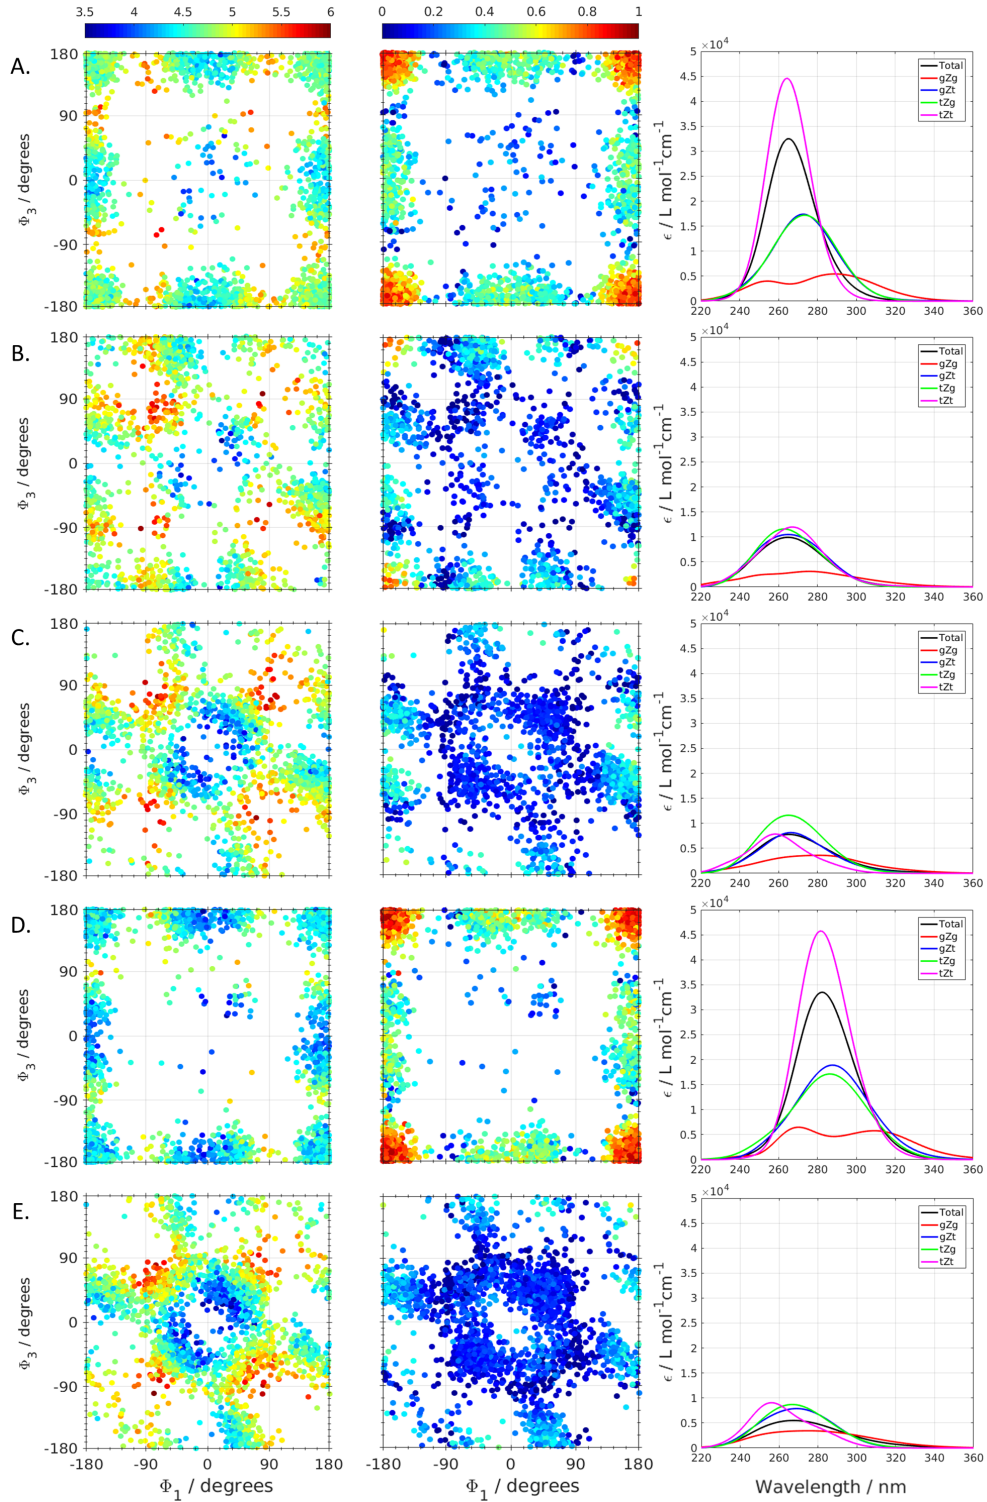

Figure 1: TDPBE0  $S_1 \leftarrow S_0$  excitation energy in eV (left column), oscillator strength (length gauge) in atomic units (middle column) as a function of dihedral angles  $\phi_1$  and  $\phi_3$ . Right column: absorption spectra of the HT derivatives and their conformers. Molecules are listed by rows. A: HT, B: DMHT, C: 2,5-IMHT, D: 1,4-IMHT, E: DIHT.

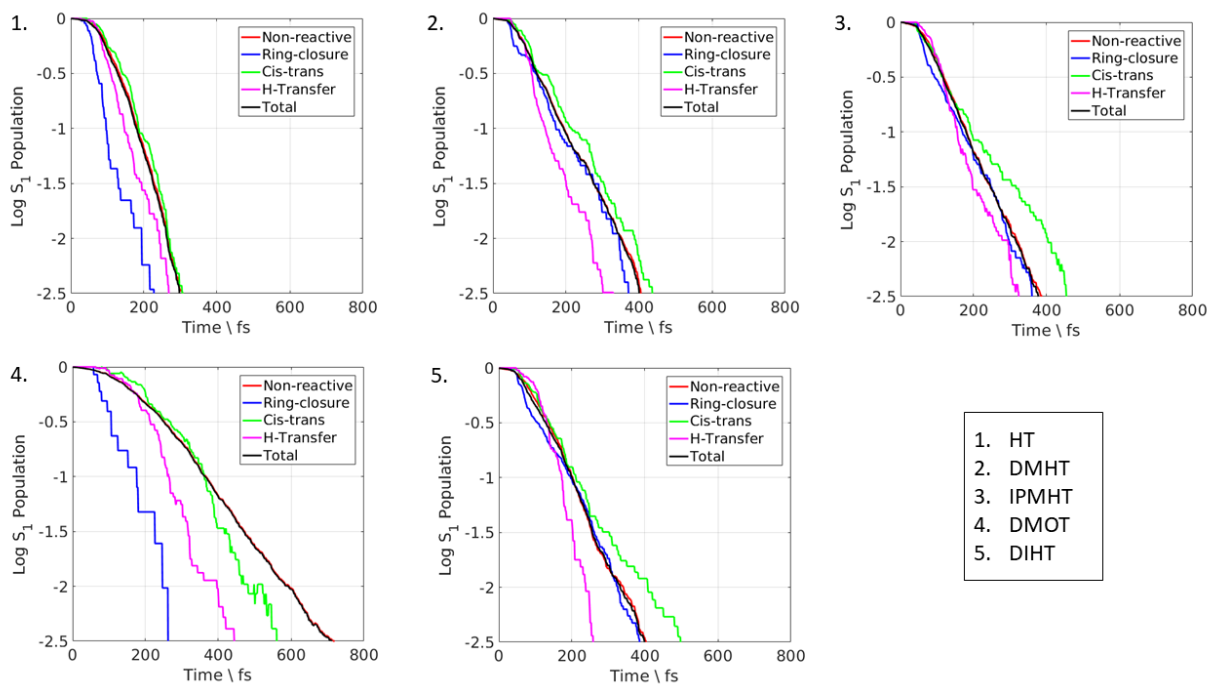

Figure 2: Logarithm of the excited state populations of the HT derivatives for the different reaction channels.
